# Supplementary material for: Antimicrobial Use Surveillance Indicators for Finfish Aquaculture Production: A Review
Source: Front Vet Sci. 2021 Mar 11;8:595152. doi: 10.3389/fvets.2021.595152 (PMC7991786; doi:10.3389/fvets.2021.595152)
Supplement: Supplementary file 2 [file Data_Sheet_2.xlsx]

## Sheet: Sheet1
		Supplementary Table 2. Complete list of articles and their extracted data that were included in the final review.
	Article Title	Full Citation	Year of Publication	Location	Objective(s) (verbatim)	Study Design	Livestock population of interest	AMU Metric and/or indicator considered
	Antimicrobial Use and Antimicrobial Resistance Indicators-Integration of Farm-Level Surveillance Data From Broiler Chickens and Turkeys in British Columbia, Canada	Agunos, A., Gow, S. P., Leger, D. F., Carson, C. A., Deckert, A. E., Bosman, A. L., . . . Reid-Smith, R. J. (2019). Antimicrobial Use and Antimicrobial Resistance Indicators-Integration of Farm-Level Surveillance Data From Broiler Chickens and Turkeys in British Columbia, Canada. Front Vet Sci, 6(APR), 131. doi:https://doi.org/10.3389/fvets.2019.00131	2019	Canada	The objective of this study was to describe AMU trends (2013–2017) in poultry sampled through CIPARS in BC, compare AMU between poultry species, describe AMR over time, and to compare potential AMU and AMR indicators for data integration.	Secondary data anlysis of CIPARS poultry data from BC	Broiler Chickens, Turkeys	- Frequency of use (number of flocks reporting AMU/total number of flocks sampled) - Weight-Based Indicator (mg/PCU) - Dose-Based Indicators (nDDDvetCA/1,000 animal-days at risk and nDDDvetCA/PCU) - Frequency of resistance (CLSI, MIC) - Frequency of multiclass-resistance (CIPARS) - AMR Indicator Index (Primary and Secondary)
	Antimicrobial use surveillance in broiler chicken flocks in Canada, 2013-2015	Agunos, A., Leger, D. F., Carson, C. A., Gow, S. P., Bosman, A., Irwin, R. J., & Reid-Smith, R. J. (2017). Antimicrobial use surveillance in broiler chicken flocks in Canada, 2013-2015. PLoS One, 12(6), e0179384. doi:https://doi.org/10.1371/journal.pone.0179384	2017	Canada	With the global and national importance of collecting AMU data and the previous gap in knowledge of use of antimicrobials in broilers in Canada, the objectives of this analysis were to describe temporal changes in AMU from 2013 to 2015 from sentinel broiler chicken farms in Canada, to compare various AMU metrics or indicators, to compare the relative distribution of AMU classes in broiler chicken…	Secondary data analysis of CIPARS poultry data, CIPARS swine data, and CAHI antimicrobial distribution data.	Broiler chickens	- total kg active ingredient - mg/PCU - nDDDvetCA (number of Defined Daily Doses in animals using Canadian standards) - nDDDvetCA/1,000 chicken-days at risk - Animal treatment days/cycle (ATD/cycle)
	Developing Canadian Defined Daily Doses for Animals: A Metric to Quantify Antimicrobial Use	Bosman, A. L., Loest, D., Carson, C. A., Agunos, A., Collineau, L., & Leger, D. F. (2019). Developing Canadian Defined Daily Doses for Animals: A Metric to Quantify Antimicrobial Use. Front Vet Sci, 6, 220. doi:https://doi.org/10.3389/fvets.2019.0022	2019	Canada	Describe the development of DDDvetCA standards for pigs and poultry (broiler chickens and turkeys) for authorized and compounded antimicrobial active ingredients used in Canada, including those used extra-label; and (2) to compare the DDDvetCAs with EMA’s DDDvets, where possible. Species-specific DDDvetCAs were assigned based on the average of unique antimicrobial daily doses obtained from produc…	Secondary data analysis of: daily doses of antimicrobials from the Canadian Compendium of Veterinary Products and the Compendium of Medicating Ingredient Brochures, Health Canada Category of AAI, EMA DDDs, and CIPARS DDDs	Swine, Poultry	Defined daily dose (DDDvet), Defined daily dose using Canadian Doses (DDDvetCA)
	Calculation of Antimicrobial Use Indicators in Beef Feedlots-Effects of Choice of Metric and Standardized Values	Brault, S. A., Hannon, S. J., Gow, S. P., Otto, S. J. G., Booker, C. W., & Morley, P. S. (2019). Calculation of Antimicrobial Use Indicators in Beef Feedlots-Effects of Choice of Metric and Standardized Values. Front Vet Sci, 6, 330. doi:https://doi.org/10.3389/fvets.2019.00330	2019	Canada	The aim of this publication is to present selected parenteral data from a study of AMU in 36 beef feedlots in western Canada (36) to demonstrate the influence of factors such as cattle weight estimates, choice of indicator, and estimates of DOE of AMD on the calculations of AMU indicators. Four examples will be explored: (1) comparison of dose-based AMU metrics (numerator only) using actual and e…	Secondary data analysis of parenteral data on mixed-breed cattle from another report.	Beef	- total mg of active ingredient overall - Animal Daily Dose : ADDkg (mg/kg/day), nADD (number of ADD)
	Antimicrobial Use on 36 Beef Feedlots in Western Canada: 2008-2012	Brault, S. A., Hannon, S. J., Gow, S. P., Warr, B. N., Withell, J., Song, J., . . . Morley, P. S. (2019). Antimicrobial Use on 36 Beef Feedlots in Western Canada: 2008-2012. Front Vet Sci, 6(October), 329. doi:https://doi.org/10.3389/fvets.2019.00329	2019	Canada	In this study, a census sample of >2.6 million cattle entering feedlots in western Canada over ∼4 years was performed to summarize AMU in this sector, increase knowledge of the indications for which AMD are administered, and evaluate trends in AMU over time. In addition to providing an unprecedented representation of AMU in fed cattle in western Canada, this study also sought to evaluate the deve…	Analytic (Primary Research)	Beef	Number of animal daily doses (nADD), grams of antimcirobial drug per 100,000 cattle
	Guidance on the Selection of Appropriate Indicators for Quantification of Antimicrobial Usage in Humans and Animals	Collineau, L., Belloc, C., Stark, K. D., Hemonic, A., Postma, M., Dewulf, J., & Chauvin, C. (2017). Guidance on the Selection of Appropriate Indicators for Quantification of Antimicrobial Usage in Humans and Animals. Zoonoses Public Health, 64(3), 165-184. doi:https://doi.org/10.1111/zph.12298	2017	Switzerland	The objective of this review article is to provide guidance to select the most suitable indicators of antimicrobial usage and data sources in accordance with a specific study objective. Indicators from both veterinary and human medicine are included for two reasons: (i) some of the difficulties associated with the quantification of antimicrobial usage are common to both disciplines; each discipli…	Review Article	Various Species	Amount of active substance /PCU, Defined Daily Dose for Animals (DDDvet), Defined Course Dose for Animals (DCDvet), Course Dose Animal (ACD), Animal level of exposure to antimicrobials (ALEA), Treatment incidence (TI), Used daily Dose (UDDvet)
	High-Resolution Monitoring of Antimicrobial Consumption in Vietnamese Small-Scale Chicken Farms Highlights Discrepancies Between Study Metrics	Cuong, N. V., Phu, D. H., Van, N. T. B., Dinh Truong, B., Kiet, B. T., Hien, B. V., . . . Carrique-Mas, J. (2019). High-Resolution Monitoring of Antimicrobial Consumption in Vietnamese Small-Scale Chicken Farms Highlights Discrepancies Between Study Metrics. Front Vet Sci, 6, 174. doi:https://doi.org/10.3389/fvets.2019.00174	2019	Vietnam	Using longitudinal active surveillance on a large cohort of small-scale commercial chicken flocks, we aimed (1) to describe the types of health-supporting products used, with a focus on antimicrobial active ingredients (AAIs); (2) to describe the critical time points for antimicrobial use (AMU) during the production cycle; and (3) to compare AMU using three common metrics of AMU in chicken produc…	Longitudinal study	Poultry	Weight of active ingredient related to the weight of bird at the time of treatment (mg/kg at treatment) and (2) weight of active antimicrobial active ingredient given over the whole production cycle related to weight of chickens sold (mg/kg sold).
	Reporting the national antimicrobial consumption in Danish pigs: influence of assigned daily dosage values and population measurement	Dupont, N., Fertner, M., Kristensen, C. S., Toft, N., & Stege, H. (2016). Reporting the national antimicrobial consumption in Danish pigs: influence of assigned daily dosage values and population measurement. Acta Vet Scand, 58(1), 27. doi:https://doi.org/10.1186/s13028-016-0208-5	2016	Denmark	The aims of this paper were therefore (1) to describe the previous and present methods used by two major Danish institutions to assign ADD-values and (2) to illustrate how differences in choice of population and assigned ADD-values affect the calculated national pig antimicrobial consumption in the years surrounding the introduction of the Yellow Card initiative (2007–2013).	Retrospective databse study	Swine	Animal Daily Dose (ADD)
	Antibiotic use on German pig farms - A longitudinal analysis for 2011, 2013 and 2014	Hemme, M., Ruddat, I., Hartmann, M., Werner, N., van Rennings, L., Kasbohrer, A., & Kreienbrock, L. (2018). Antibiotic use on German pig farms - A longitudinal analysis for 2011, 2013 and 2014. PLoS One, 13(7), e0199592. doi:https://doi.org/10.1371/journal.pone.0199592	2018	Germany	To analyze the temporal trend in more detail, the present work focused on the change in antibiotic usage over time in German livestock husbandry, investigating the years 2011, 2013 and 2014. Since some publications have shown that various factors influence both disease incidence and antibiotic use magnitude, the question arises, weather specific factors associated with antibiotic use can be ident…	Cross-Sectional, Longitudinal	Swine	Number of used daily doses (nUDD), Treatment frequency (TF)
	Quantitative analysis of antimicrobial use on British dairy farms	Hyde, R. M., Remnant, J. G., Bradley, A. J., Breen, J. E., Hudson, C. D., Davies, P. L., . . . Green, M. J. (2017). Quantitative analysis of antimicrobial use on British dairy farms. Vet Rec, 181(25), 683. doi:http://dx.doi.org/10.1136/vr.104614	2017	United Kingdom	This study aims to provide an evaluation of the levels of AMU in a convenience sample of British dairy farms over a _x000E_12 month period and to identify factors associated with high usage on these farms.	Analytic (Primary Research)	Dairy Cattle	Total mg of active antimicrobial ingredient per population correction unit (mg/PCU), defined daily doses (DDDvet) and defined course doses (DCDvet)
	Quantitative and qualitative analysis of antimicrobial usage at farm and flock level on 181 broiler farms in nine European countries	Joosten, P., Sarrazin, S., Van Gompel, L., Luiken, R. E. C., Mevius, D. J., Wagenaar, J. A., . . . consortium, E. (2019). Quantitative and qualitative analysis of antimicrobial usage at farm and flock level on 181 broiler farms in nine European countries. J Antimicrob Chemother, 74(3), 798-806. doi:https://doi.org/10.1093/jac/dky498	2019	Belgium, Bulgaria, Denmark, France, Germany, Italy, Poland, Spain, Netherlands	To control the emerging threat of antimicrobial resistance, international policy appeals for appropri- ate monitoring of antimicrobial usage (AMU) at supranational, species and farm level. The aim of this study was to quantify AMU in broilers at farm and flock level in nine European countries.	Cross-Sectional Survey	Broiler Chickens	Treatment Incidence (TI), Defined daily Dose (DDDvet), Defined daily course Dose (DCDvet), Use daily dose (UDDvet). TI is expressed as the number of DDDvet or UDDvet administered per 100animal-days at risk or the number of days per 100animal-days that the flock is receiving a dose of antimicrobials, reflecting the percentage of time that a broiler is treated with antimicrobials in its life. When …
	Used Daily Dose vs. Defined Daily Dose-Contrasting Two Different Methods to Measure Antibiotic Consumption at the Farm Level	Kasabova, S., Hartmann, M., Werner, N., Kasbohrer, A., & Kreienbrock, L. (2019). Used Daily Dose vs. Defined Daily Dose-Contrasting Two Different Methods to Measure Antibiotic Consumption at the Farm Level. Front Vet Sci, 6, 116. doi:https://doi.org/10.3389/fvets.2019.00116	2019	Germany	In our current evaluation of a data subset of the VetCAb- S study collective (23), we aimed to compare two different methods that are used to calculate antibiotic usage at the farm level. We investigated the differences between applying the Used Daily Dose (UDD) and Defined Daily Dose (DDD) to quantify antibiotic consumption and benchmark farms. The aim of the study was to demonstrate the discrep…	Analytic (Primary Research)	Swine	Treatment frequency (TF), Used daily Dose (UDD), Defined Daily dose (DDD)
	The use of antimicrobials in global pig production: A systematic review of methods for quantification	Lekagul, A., Tangcharoensathien, V., & Yeung, S. (2018). The use of antimicrobials in global pig production: A systematic review of methods for quantification. Prev Vet Med, 160, 85-98. doi:https://doi.org/10.1016/j.prevetmed.2018.09.016	2018	Thailand	This systematic review will describe and compare methods and measurement to quantify antimicrobial use in pigs, in order to con- tribute to the process of future guideline development of monitoring the antimicrobial use.	Systematic Review	Various Species	Milligrams and kilograms of active ingredient (kg, mg), Defined daily dose, animal daily dose, daily product dose, used daily dose, prescribed daily dose, Prescribed daily dose (PDD), Treatment incidence (TI), Treatment frequency (TF), milligrams of active substance per kilogram or PCU of animal at risk (mg/kg, mg/PCU)
	Evaluation of metrics for benchmarking antimicrobial use in the UK dairy industry	Mills, H. L., Turner, A., Morgans, L., Massey, J., Schubert, H., Rees, G., . . . Reyher, K. K. (2018). Evaluation of metrics for benchmarking antimicrobial use in the UK dairy industry. Veterinary Record, 182(13), 379-379. doi:10.1136/vr.104701	2018	United Kingdom	The aim of this manuscript is to specifcally focus on the pros and cons of a selection of metrics for measuring AMU in the UK dairy cattle industry, although most metrics presented can be applied to other types of livestock.	Review Article	Dairy Cattle	Total milligrams of active ingredient (mg), Total milligrams of active ingredient per kilogram of at-risk animal (mg/kg), milligrams of active ingredient per population correction unit (PCU), Defined Daily dose (DDD, DDDvet), Defined course dose Animal (DCDvet), Cow calculated course (CCC)
	Towards an improved estimate of antimicrobial use in animals: Adjusting the “population correction unit” calculation	Radke, B. R. (2017). Towards an improved estimate of antimicrobial use in animals: Adjusting the “population correction unit” calculation. Canadian Journal of Veterinary Research, 81(3), 235-240. doi:https://www.ncbi.nlm.nih.gov/pmc/articles/PMC5508379/	2017	Canada	The objective of this paper was to compare the currently accepted PCU calculation with that of the adjusted population correction unit (APCU), which re-evaluates the standard animal weights used in the calculation and accounts for animal lifespan.	Analytic (Primary Research)	Various Species	Population correction Unit (PCU), adjusted population correction unit (APCU)
	Quantification of antibiotic use on dairy farms in Pennsylvania	Redding, L. E., Bender, J., & Baker, L. (2019). Quantification of antibiotic use on dairy farms in Pennsylvania. J Dairy Sci, 102(2), 1494-1507. doi:https://doi.org/10.3168/jds.2018-15224	2019	United States	The goal of this study was to quantitatively and qualitatively charac- terize antibiotic use on dairy farms in Pennsylvania, the state with second largest number of dairy farms nationally.	Survey	Dairy Cattle	Total amount of active ingredient (milligrams), Animal defined daily Doses (ADD), Days of Therapy (DOT)
	Quantitative and qualitative antimicrobial usage patterns in farrow-to-finish pig herds in Belgium, France, Germany and Sweden	Sjölund, M., Postma, M., Collineau, L., Losken, S., Backhans, A., Belloc, C., . . . consortium, M. (2016). Quantitative and qualitative antimicrobial usage patterns in farrow-to-finish pig herds in Belgium, France, Germany and Sweden. Prev Vet Med, 130, 41-50. doi:https://doi.org/10.1016/j.prevetmed.2016.06.003	2016	Belgium, France, Germany, Sweden	Data on sales of antimicrobials using a standardised methodology have shown that there are vast differ- ences between countries in amounts of antimicrobials sold for food-producing animals, but these data do not provide insight on how sales are distributed by species and age groups. The aim of this study was to compare herd level antimicrobial usage for pigs by age category, antimicrobial class a…	Cross-Sectional Study	Swine	Milligrams of active substance, Treatment incidence, Defined daily doses per 1000 pig-days at risk, Defined Daily dose Animal (DDDA)
	Extrapolating Antibiotic Sales to Number of Treated Animals: Treatments in Pigs and Calves in Switzerland, 2011-2015	Stebler, R., Carmo, L. P., Heim, D., Naegeli, H., Eichler, K., & Muentener, C. R. (2019). Extrapolating Antibiotic Sales to Number of Treated Animals: Treatments in Pigs and Calves in Switzerland, 2011-2015. Front Vet Sci, 6, 318. doi:10.3389/fvets.2019.00318	2019	Switzerland	The main aim of this study was to provide for the first time an extrapolation of the available national sales data to the number of treated animals in Switzerland.	Analytic (Primary Research)	Swine, Cattle	Sales Data, Animal course dose (ACD)
	How Input Parameters and Calculation Rules Influence On-Farm Antimicrobial Use Indicators in Animals	Waret-Szkuta, A., Coelho, V., Collineau, L., Hemonic, A., Buy, C., Treff, M., & Raboisson, D. (2019). How Input Parameters and Calculation Rules Influence On-Farm Antimicrobial Use Indicators in Animals. Front Vet Sci, 6, 438-438. doi:https://doi.org/10.3389/fvets.2019.00438	2019	France	This study aimed to investigate antimicrobial use at the weaning stage in French pig farms and, more specifically, the impact the sources of information regarding doses, body weight at treatment and treatment length, had on the indicators results.	Cross-sectional survey	Swine	Number of Daily doses per animal (nDD), number of course doses per animal (nCD), Treatment incidence (TI), Animal level exposure to Antibiotics (ALEA)
	Monitoring Antimicrobial Drug Usage in Animals: Methods and Applications	Werner, N., McEwen, S., & Kreienbrock, L. (2018). Monitoring Antimicrobial Drug Usage in Animals: Methods and Applications. Microbiology spectrum, 6(4), 10.1128/microbiolspec.ARB-2017. doi:https://doi.org/10.1128/microbiolspec.ARBA-0015-2017	2018	United States	The goal of this article is to describe how monitoring systems for antimicrobial drug usage in animals are set up and conducted, using examples from specific countries as well as international efforts.	Review	Various Species	Defined Daily Dose Animal (DDDA), Used Daily Dose (UDD), Prescribed Daily Dose (PDD), Sum of single applictions or number of Used Daily Doses (nUDDs). Treatment frequency, Treatment incidence/density, Sales Data
	European Surveillance of Veterinary Antimicrobial Consumption (ESVAC) Sales Data and Animal Population Data Collection Protocol (version 3)	European Medicines Agency. (2019). European Surveillance of Veterinary Antimicrobial Consumption (ESVAC) Sales Data and Animal Population Data Collection Protocol (version 3). Veterinary Medicines Division, Retrieved from https://www.ema.europa.eu/en/documents/other/european-surveillance-veterinary-antimicrobial-consumption-esvac-web-based-sales-animal-population_en.pdf	2019	European Union	The European Commission has requested the European Medicines Agency to take the lead in collating data on the use of antimicrobial agents in animals in the European Union and to manage the database. The European Medicines Agency was asked to develop a harmonised approach for the collection and reporting of data based on national sales figures as well as data on usage in at least major groups of a…	Governmental Report	Various Species	Sales data, Population Correction Unit. Indicator for reporting sales data: Amount sold in metric tonnes*10^9/PCU in kg
	Canadian Integrated Programe for Antimicrobial Reistance, Surveillance (CIPARS) 2017: Design and Methods. Public Health Agency of Canada, Guelph, Ontario, 2020	Government of Canada. (2020). Canadian Integrated Programe for Antimicrobial Reisstance, Surveillance (CIPARS) 2017: Design and Methods. Public Health Agency of Canada, Guelph, Ontario, 2020.	2020	Canada	The Canadian Integrated Program for Antimicrobial Resistance Surveillance (CIPARS) collects, analyses, and communicates trends in antimicrobial use and in antimicrobial resistance for select bacteria from humans, animals, and retail meat across Canada. The bacteria under surveillance are known as enteric bacteria (they can be found in the intestines of people and animals) and can be transmitted b…	Governmental Report	Various Species	Milligrams of active ingredient/Population Correction Unit (mg/PCU), Canadian Defined Daily Doses with Canadian Doses (DDDvetCA), Number of defined Daily doses (nDDDvetCA), Number of Canadian Defined Daily Doses/Population Correction Unit (nDDDvetCA/PCU), Number of DDDvetCA/1000 animls days at risk
	Integrated Surveillance of Antimicrobial Resistance in Foodborne Bacteria: Application of a One Health Approach	World Health Organization. (2017). Integrated Surveillance of Antimicrobial Resistance in Foodborne Bacteria: Application of a One Health Approach. Retrieved from https://www.who.int/foodsafety/publications/agisar_guidance2017/en/	2017	Various Member States, Stakeholders	The purpose of this guidance is to assist WHO Member States, and other stakeholders, in the establishment and development of programmes of integrated surveillance of antimicrobial resistance in foodborne bacteria (i.e., bacteria commonly transmitted by food).	Intergovernmental Report	Various Species	National Antimicrobial Sales Data. Milligrams of active substance per PCU (mg/PCU). Farm level prescription and sales Data.
	Monitoring of Antimicrobial Resistance and Antibiotic Usage in Animals in the Netherlands in 2017	Wageningen Bioveterinary Research. (2018). Monitoring of Antimicrobial Resistance and Antibiotic Usage in Animals in the Netherlands in 2017. Retrieved from https://www.wur.nl/upload_mm/7/b/0/5e568649-c674-420e-a2ca-acc8ca56f016_Maran%202018.pdf	2018	Netherlands	This report is published under the acronym MARAN-2018 by Wageningen Bioveterinary Research (WBVR) in collaboration with the Food and Consumer Product Safety Authority (NVWA), the National Institute for Public Health and the Environment (RIVM) and the Netherlands Veterinary Medicines Institute (SDa). The information presented in MARAN-2018 is based on total sales data and animal specific usage of …	Governmental Report	Various Species	-Sales Data, Annual national Defined daily dose Animal (DDDA national), Annual defined dailed doses per year farm (DDDA farm).
	DANMAP 2017 - Use of antimicrobial agents and occurrence of antimicrobial resistance in bacteria from food animals, food and humans in Denmark	Statens Serum Institut. (2017). DANMAP 2017 - Use of antimicrobial agents and occurrence of antimicrobial resistance in bacteria from food animals, food and humans in Denmark. Retrieved from https://en.ssi.dk/surveillance-and-preparedness/surveillance-in-denmark/annual-reports-on-disease-incidence/danmap-2017	2017	Denmark	-To monitor the consumption of antimicrobial agents in food animals and humans -To monitor the occurrence of antimicrobial resistance in bac- teria isolated from food animals, food of animal origin (e.g. meat) and humans -To study associations between antimicrobial consumption and antimicrobial resistance -To identify routes of transmission and areas for further research studies-	Governmental Report	Various Species	-Kilograms of active compound. Defined animal daily doses (DADDs). DAPD is a statistical measure, which provides a rough estimate of the proportion of animals treated daily with an average main- tenance dose of a particular antimicrobial agent. For example, 10 DAPDs indicate that an estimated 1% of the population, on average, receives a certain treatment on a given day. The DAPD is also referred …
	ECDC, EFSA and EMA Joint Scientific Opinion on a list of outcome indicators as regards surveillance of antimicrobial resistance and antimicrobial consumption in humans and food-producing animals ECDC, EFSA Panel on Biological Hazards (BIOHAZ) and EMA Committee for Medicinal Products for Veterinary Use (CVMP)*	Cormican, M., Hopkins, S., Jarlier, V., Reilly, J., Simonsen, S., Strauss, R., . . . Torren-Edo, J. (2017). ECDC, EFSA and EMA Joint Scientific Opinion on a list of outcome indicators as regards surveillance of antimicrobial resistance and antimicrobial consumption in humans and food-producing animals ECDC, EFSA Panel on Biological Hazards (BIOHAZ) and EMA Committee for Medicinal Products for Vet…	2017	30 EU Member States	In order to support European Union (EU) Member States (MSs) in their efforts to address antimicrobial resistance (AMR), the European Commission requested the European Centre for Disease Prevention and Control (ECDC), the European Food Safety Authority (EFSA) and the European Medicines Agency (EMA) to jointly establish a list of harmonised outcome indicators for antimicrobial consumption (AMC) and…	Review	Various Species	-The selected indicators are divided into primary and secondary indicators. Primary indicators broadly reflect the situation concerning AMC and AMR. Although they do not cover all aspects of AMC and AMR, they can be used to provide a general assessment of the overall situation in each MS. Secondary indicators are designed to provide information on more specific issues that are also considered of …
	OIE Annual report on antimicrobial agents intended for use in animals. Better understanding of the global situation, Third Report	World Organisation for Animal Health (OIE) (2018). OIE Annual report on antimicrobial agents intended for use in animals. Better understanding of the global situation, Third Report. Paris, France. https://www.oie.int/fileadmin/Home/eng/Our_scientific_expertise/docs/pdf/AMR/Annual_Report_AMR_3.pdf	2018	153 OIE member countries + 2 non-member countries	This report presents the results of the third round of the annual collection of data on antimicrobial agents intended for use in animals. The data collection highlights the current situation of governance of veterinary antimicrobials in responding OIE Member Countries and participating non-OIE Member Countries, and includes submissions of quantitative data where countries are able to provide them…	Governmental Report	Various Species	Total mg of active antimicrobial ingredient per population correction unit (mg/PCU)
